# Supplementary material
Source: publisher figshare collection journal article supplement (https://tandf.figshare.com/ndownloader/files/13642022)
Supplement: Supplementary file 1 [file 13642022]

**Supplementary Materials:**

In the over 70 year-old male and female subjects, the trends of the switching SBP levels from AM to LM were similar with those of the 40 to 69 year-old subjects (Supplementary Table S3-S5).

**Sensitivity analyses according to the different assumptions of the relationships between SBP and IRCVD and the SBP frequency distributions**

The representative natural log-normal frequency distributions of SBP and the representative quadratic relationship between SBP and IRCVD were demonstrated in Supplementary Figure 1A and 1B, respectively.

Sensitivity analyses in the quadratic relationships between SBP and IRCVD (Supplementary Table S6-S9) and in the right-skewed frequency distributions of SBP (Supplementary Table S10-S13) confirmed that the inferred SBP levels to switch from LM to AM were similar with the original simulations (Table 1, Supplementary Table S3-S5).

**
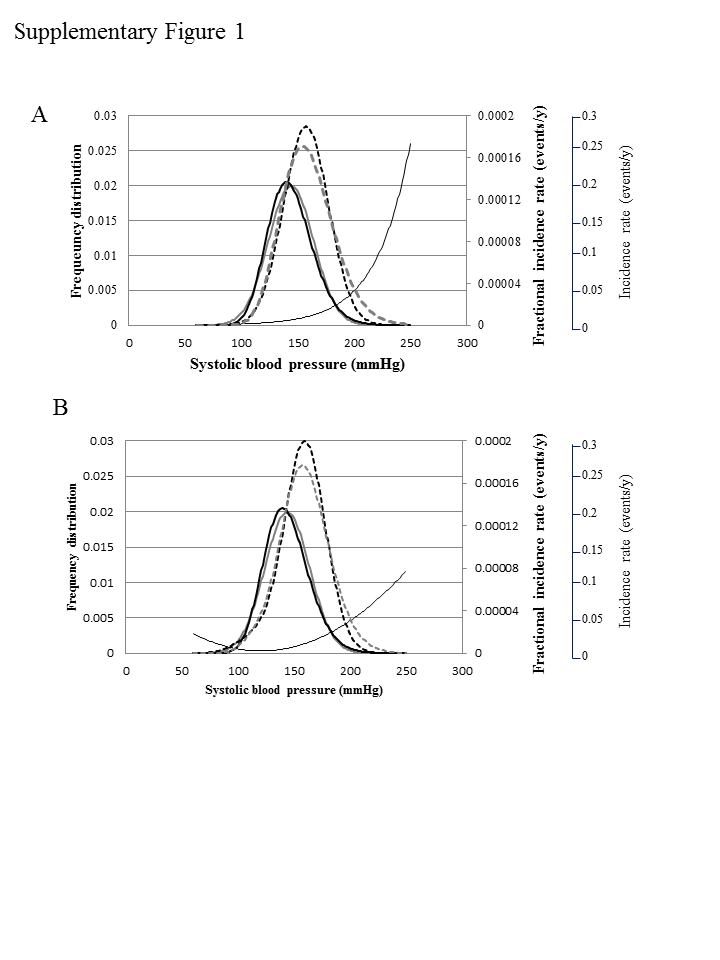
**

**Supplementary Figure Legend**

Relationships between systolic blood pressure (SBP) and incidence rates of cardiovascular disease (IRCVD) without interventions in 60 to 69 year-old male subjects. (**a**) The thin black line represents an exponential relationship between SBP and IRCVD. The solid thick black and grey lines represent the frequency normal and natural log-normal distributions of SBP, respectively. The broken thick black and grey lines represent IRCVD under the frequency normal and natural log-normal distributions of systolic blood pressure, respectively. (**b**) The thin black line represents a quadratic relationship between SBP and IRCVD. The solid thick black and grey lines represent the frequency normal and natural log-normal distributions of SBP, respectively. The broken thick black and grey lines represent IRCVD under the normal and natural log-normal frequency distributions of SBP (Supplementary Table 6S and 10S), respectively.

**Table S1. Constants used in the simulation**

| **Constants of SBP frequency distributions** | | | | | | **40 - 69 M 40 – 69 F** | | **70-79 M** | | | **80- M**  **70-79 F** | | **80 – F** | |
| --- | --- | --- | --- | --- | --- | --- | --- | --- | --- | --- | --- | --- | --- | --- |
| **Constants of IRCVD** | | | | | | **40-69 M 40-69 F** | | **70-79 M** | | | **80- M**  **70-79 F** | | **80- F** | |
| k | the slope of the exponential curves | | | | | 30  30 | | 35 | | | 40  40 | | 50 | |
| l | the absolute value of IRCVD | | | | | 300-150  400-180 | | 80 | | | 50  80 | | 40 | |
| m | the rising point from exp(0) = 1 | | | | | 160-140  180-150 | | 120 | | | 120  130 | | 120 | |
| **Constants of LM** | | | | **Ideal** | | | **Optimistic** | | | **Realistic** | | **Pessimistic** | | |
| ****(mmHg) | | |  | 28 | | | 15 | | | 8 | | 5 | | |
| **** | | |  | 0.5 | | | 0.275 | | | 0.1375 | | 0.075 | | |
| **Constants of AM** | | | | | **Strict** | | **Realistic** | | **Modest** | | | **Loose** | |
| **a** (mmHg) | | Alarming SBP | | | 130 | | 140 | | 150 | | | 160 | |
| **b** | | Accessibility factor | | | 0.05 | | 0.03 | | 0.02 | | | 0.01 | |
| **c** (mmHg) | | Target SBP level | | | 130 | | 140 | | 140 | | | 150 | |
| **d** | | Adherence factor | | | 0.8 | | 0.7 | | 0.6 | | | 0.5 | |

Abbreviations: IRCVD, the incidence rate of cardiovascular disease; M, male; F, female; LM, lifestyle modifications [16, 17, 25, 29, 31-33]; ****, the total effects of successful LM on systolic blood pressure (SBP) (mmHg) including metabolic factors; , proportion of participating LM; AM, antihypertensive medications [1, 2, 16, 17, 21, 30, 35, 36]; a, an alarming SBP, above which patients should be concerned about their SBP; b, an accessibility factor to a primary physician; c, the target SBP level; d, adherence for reaching the target SBP level [9, 16, 17, 37-40].

The constants, l and m, were deleted in the final differential equation (9, the lower line) although they had different values in the subpopulations according to sex and age.

**Table S2. Representative SBP changes from 160 and 180 mmHg according to the various scenarios in 60 to 69 year-old male subjects**

| **LM** | | **Ideal** | **Optimistic** | **Realistic** | **Pessimistic** |
| --- | --- | --- | --- | --- | --- |
| **Average SBP level after successful and unsuccessful LM** (mmHg) | from 160 | 143 | 154 | 158 | 159 |
| from 180 | 163 | 174 | 178 | 179 |
| **AM** |  | **Strict** | **Realistic** | **Modest** | **Loose** |
| **Consultation rate** | from 160 | 0.78 | 0.45 | 0.18 | 0 |
| from 180 | 0.92 | 0.70 | 0.45 | 0.18 |
| **SBP lowering effect** (mmHg) | from 160 | 24 | 14 | 12 | 10 |
| from 180 | 40 | 28 | 24 | 15 |
| **Average SBP level after AM** (mmHg) | from 160 | 141 | 154 | 158 | 160 |
| from 180 | 143 | 160 | 169 | 177 |

Abbreviations: SBP, systolic blood pressure; LM, lifestyle modifications; AM, antihypertensive medications.

**Table S3. Simulation-oriented switching SBP level in 70 to 79 year-old male subjects**

| **Lifestyle modifications**  **supported by health nurses** | | **Ideal** | **Optimistic** | **Realistic** | **Pessimistic** |
| --- | --- | --- | --- | --- | --- |
| **Antihypertensive medications** | |  |  |  |  |
| **Consultation rate** | **SBP lowering effect** |  |  |  |  |
| **Strict** | **Strict** | 158 | 146 | 139 | 137 |
| **Realistic** | 168 | 154 | 147 | 144 |
| **Modest** | 171 | 155 | 148 | 145 |
| **Loose** | 185 | 165 | 157 | 154 |
| **Realistic** | **Strict** | 169 | 155 | 148 | 145 |
| **Realistic** | 176 | 155 | 153 | 149 |
| **Modest** | 181 | 163 | 154 | 150 |
| **Loose** | 192 | 171 | 161 | 157 |
| **Modest** | **Strict** | 181 | 165 | 157 | 154 |
| **Realistic** | 189 | 170 | 157 | 157 |
| **Modest** | 192 | 172 | 162 | 158 |
| **Loose** | 203 | 180 | 168 | 163 |
| **Loose** | **Strict** | 205 | 181 | 170 | 166 |
| **Realistic** | 212 | 186 | 174 | 168 |
| **Modest** | 216 | 189 | 175 | 169 |
| **Loose** | 227 | 196 | 180 | 173 |

Abbreviations: SBP, systolic blood pressure.

**Table S4. Simulation-oriented switching SBP level in over 80 year-old male and 70 to 79 year-old female subjects**

| **Lifestyle modifications**  **supported by health nurses** | | **Ideal** | **Optimistic** | **Realistic** | **Pessimistic** |
| --- | --- | --- | --- | --- | --- |
| **Antihypertensive medications** | |  |  |  |  |
| **Consultation rate** | **SBP lowering effect** |  |  |  |  |
| **Strict** | **Strict** | 158 | 146 | 139 | 137 |
| **Realistic** | 168 | 154 | 147 | 144 |
| **Modest** | 172 | 155 | 148 | 145 |
| **Loose** | 185 | 165 | 157 | 154 |
| **Realistic** | **Strict** | 169 | 155 | 148 | 145 |
| **Realistic** | 177 | 155 | 153 | 149 |
| **Modest** | 181 | 163 | 154 | 150 |
| **Loose** | 192 | 171 | 161 | 157 |
| **Modest** | **Strict** | 181 | 165 | 158 | 155 |
| **Realistic** | 188 | 170 | 161 | 157 |
| **Modest** | 192 | 172 | 162 | 158 |
| **Loose** | 203 | 180 | 168 | 163 |
| **Loose** | **Strict** | 204 | 181 | 170 | 166 |
| **Realistic** | 211 | 185 | 173 | 168 |
| **Modest** | 215 | 188 | 175 | 169 |
| **Loose** | 227 | 195 | 180 | 173 |

Abbreviations: SBP, systolic blood pressure.

**Table S5. Simulation-oriented switching SBP level in over 80 year-old female subjects**

| **Lifestyle modifications**  **supported by health nurses** | | **Ideal** | **Optimistic** | **Realistic** | **Pessimistic** |
| --- | --- | --- | --- | --- | --- |
| **Antihypertensive medications** | |  |  |  |  |
| **Consultation rate** | **SBP lowering effect** |  |  |  |  |
| **Strict** | **Strict** | 158 | 146 | 139 | 137 |
| **Realistic** | 168 | 153 | 147 | 144 |
| **Modest** | 172 | 155 | 148 | 145 |
| **Loose** | 185 | 165 | 157 | 154 |
| **Realistic** | **Strict** | 169 | 155 | 148 | 145 |
| **Realistic** | 177 | 161 | 153 | 149 |
| **Modest** | 181 | 163 | 154 | 150 |
| **Loose** | 192 | 171 | 161 | 157 |
| **Modest** | **Strict** | 181 | 165 | 157 | 154 |
| **Realistic** | 188 | 170 | 157 | 157 |
| **Modest** | 192 | 172 | 162 | 158 |
| **Loose** | 203 | 180 | 168 | 163 |
| **Loose** | **Strict** | 201 | 181 | 170 | 164 |
| **Realistic** | 209 | 185 | 173 | 168 |
| **Modest** | 213 | 188 | 175 | 169 |
| **Loose** | 224 | 195 | 180 | 173 |

Abbreviations: SBP, systolic blood pressure.

**Table S6. Simulation-oriented switching SBP level in 40 to 69 year-old male and female subjects under the quadratic relationship between SBP and IRCVD**

| **Lifestyle modifications**  **supported by health nurses** | | **Ideal** | **Optimistic** | **Realistic** | **Pessimistic** |
| --- | --- | --- | --- | --- | --- |
| **Antihypertensive medications** | |  |  |  |  |
| **Consultation rate** | **SBP lowering effect** |  |  |  |  |
| **Strict** | **Strict** | 158 | 146 | 139 | 137 |
| **Realistic** | 168 | 154 | 147 | 144 |
| **Modest** | 172 | 155 | 148 | 145 |
| **Loose** | 185 | 165 | 157 | 154 |
| **Realistic** | **Strict** | 169 | 155 | 148 | 145 |
| **Realistic** | 177 | 161 | 153 | 149 |
| **Modest** | 181 | 163 | 154 | 150 |
| **Loose** | 193 | 171 | 161 | 157 |
| **Modest** | **Strict** | 180 | 165 | 157 | 154 |
| **Realistic** | 188 | 170 | 161 | 157 |
| **Modest** | 192 | 172 | 162 | 158 |
| **Loose** | 203 | 180 | 168 | 163 |
| **Loose** | **Strict** | 201 | 180 | 170 | 166 |
| **Realistic** | 208 | 185 | 173 | 168 |
| **Modest** | 213 | 188 | 174 | 169 |
| **Loose** | 224 | 195 | 180 | 173 |

Abbreviations: SBP, systolic blood pressure; IRCVD, incidence rate of cardiovascular disease.**Table S7. Simulation-oriented switching SBP level in 70 to 79 year-old male subjects under the quadratic relationship between SBP and IRCVD**

| **Lifestyle modifications**  **supported by health nurses** | | **Ideal** | **Optimistic** | **Realistic** | **Pessimistic** |
| --- | --- | --- | --- | --- | --- |
| **Antihypertensive medications** | |  |  |  |  |
| **Consultation rate** | **SBP lowering effect** |  |  |  |  |
| **Strict** | **Strict** | 158 | 146 | 139 | 137 |
| **Realistic** | 168 | 154 | 147 | 144 |
| **Modest** | 172 | 155 | 148 | 145 |
| **Loose** | 185 | 165 | 157 | 154 |
| **Realistic** | **Strict** | 169 | 155 | 148 | 145 |
| **Realistic** | 177 | 161 | 153 | 149 |
| **Modest** | 181 | 161 | 154 | 150 |
| **Loose** | 193 | 163 | 161 | 158 |
| **Modest** | **Strict** | 180 | 165 | 157 | 154 |
| **Realistic** | 188 | 170 | 161 | 157 |
| **Modest** | 192 | 172 | 162 | 158 |
| **Loose** | 203 | 180 | 168 | 163 |
| **Loose** | **Strict** | 201 | 180 | 170 | 166 |
| **Realistic** | 208 | 185 | 173 | 168 |
| **Modest** | 213 | 188 | 174 | 169 |
| **Loose** | 224 | 195 | 180 | 173 |

Abbreviations: SBP, systolic blood pressure; IRCVD, incidence rate of cardiovascular disease.

**Table S8. Simulation-oriented switching SBP level in over 80 year-old male and 70 to 79 year-old female subjects under the quadratic relationship between SBP and IRCVD**

| **Lifestyle modifications**  **supported by health nurses** | | **Ideal** | **Optimistic** | **Realistic** | **Pessimistic** |
| --- | --- | --- | --- | --- | --- |
| **Antihypertensive medications** | |  |  |  |  |
| **Consultation rate** | **SBP lowering effect** |  |  |  |  |
| **Strict** | **Strict** | 158 | 146 | 139 | 137 |
| **Realistic** | 168 | 154 | 147 | 144 |
| **Modest** | 172 | 155 | 148 | 145 |
| **Loose** | 185 | 165 | 157 | 154 |
| **Realistic** | **Strict** | 169 | 155 | 148 | 145 |
| **Realistic** | 177 | 161 | 153 | 149 |
| **Modest** | 181 | 163 | 154 | 150 |
| **Loose** | 193 | 171 | 161 | 157 |
| **Modest** | **Strict** | 180 | 165 | 157 | 154 |
| **Realistic** | 188 | 170 | 161 | 157 |
| **Modest** | 192 | 172 | 162 | 158 |
| **Loose** | 203 | 180 | 168 | 163 |
| **Loose** | **Strict** | 201 | 180 | 170 | 166 |
| **Realistic** | 208 | 185 | 173 | 168 |
| **Modest** | 213 | 188 | 174 | 169 |
| **Loose** | 224 | 195 | 180 | 173 |

Abbreviations: SBP, systolic blood pressure; IRCVD, incidence rate of cardiovascular disease.

**Table S9. Simulation-oriented switching SBP level in over 80 year-old female subjects under the quadratic relationship between SBP and IRCVD**

| **Lifestyle modifications**  **supported by health nurses** | | **Ideal** | **Optimistic** | **Realistic** | **Pessimistic** |
| --- | --- | --- | --- | --- | --- |
| **Antihypertensive medications** | |  |  |  |  |
| **Consultation rate** | **SBP lowering effect** |  |  |  |  |
| **Strict** | **Strict** | 158 | 146 | 139 | 137 |
| **Realistic** | 168 | 154 | 147 | 144 |
| **Modest** | 172 | 155 | 148 | 145 |
| **Loose** | 186 | 166 | 157 | 154 |
| **Realistic** | **Strict** | 168 | 154 | 148 | 145 |
| **Realistic** | 177 | 161 | 152 | 149 |
| **Modest** | 181 | 162 | 153 | 150 |
| **Loose** | 193 | 171 | 161 | 157 |
| **Modest** | **Strict** | 180 | 165 | 157 | 154 |
| **Realistic** | 188 | 170 | 161 | 157 |
| **Modest** | 191 | 172 | 162 | 158 |
| **Loose** | 203 | 179 | 168 | 163 |
| **Loose** | **Strict** | 200 | 180 | 170 | 166 |
| **Realistic** | 208 | 185 | 173 | 168 |
| **Modest** | 213 | 187 | 174 | 169 |
| **Loose** | 224 | 195 | 180 | 173 |

Abbreviations: SBP, systolic blood pressure; IRCVD, incidence rate of cardiovascular disease.

**Table S10. Simulation-oriented switching SBP level in 40 to 69 year-old male and female subjects in the log-normal distribution of SBP under the quadratic relationship between SBP and IRCVD**

| **Lifestyle modifications**  **supported by health nurses** | | **Ideal** | **Optimistic** | **Realistic** | **Pessimistic** |
| --- | --- | --- | --- | --- | --- |
| **Antihypertensive medications** | |  |  |  |  |
| **Consultation rate** | **SBP lowering effect** |  |  |  |  |
| **Strict** | **Strict** | 158 | 146 | 139 | 137 |
| **Realistic** | 168 | 153 | 147 | 144 |
| **Modest** | 172 | 155 | 148 | 145 |
| **Loose** | 185 | 165 | 157 | 154 |
| **Realistic** | **Strict** | 169 | 155 | 148 | 145 |
| **Realistic** | 177 | 161 | 153 | 149 |
| **Modest** | 181 | 163 | 154 | 150 |
| **Loose** | 193 | 171 | 161 | 157 |
| **Modest** | **Strict** | 181 | 165 | 158 | 155 |
| **Realistic** | 188 | 170 | 161 | 157 |
| **Modest** | 192 | 172 | 162 | 158 |
| **Loose** | 203 | 180 | 168 | 163 |
| **Loose** | **Strict** | 201 | 180 | 170 | 166 |
| **Realistic** | 208 | 185 | 173 | 168 |
| **Modest** | 213 | 188 | 175 | 169 |
| **Loose** | 224 | 195 | 180 | 173 |

Abbreviations: SBP, systolic blood pressure; IRCVD, incidence rate of cardiovascular disease.

**Table S11. Simulation-oriented switching SBP level in 70 to 79 year-old male subjects in the log-normal distribution of SBP under the quadratic relationship between SBP and IRCVD**

| **Lifestyle modifications**  **supported by health nurses** | | **Ideal** | **Optimistic** | **Realistic** | **Pessimistic** |
| --- | --- | --- | --- | --- | --- |
| **Antihypertensive medications** | |  |  |  |  |
| **Consultation rate** | **SBP lowering effect** |  |  |  |  |
| **Strict** | **Strict** | 158 | 146 | 139 | 137 |
| **Realistic** | 168 | 153 | 147 | 144 |
| **Modest** | 172 | 155 | 148 | 145 |
| **Loose** | 185 | 165 | 157 | 154 |
| **Realistic** | **Strict** | 169 | 155 | 148 | 145 |
| **Realistic** | 177 | 161 | 153 | 149 |
| **Modest** | 181 | 163 | 154 | 150 |
| **Loose** | 192 | 171 | 161 | 157 |
| **Modest** | **Strict** | 181 | 165 | 158 | 155 |
| **Realistic** | 188 | 170 | 161 | 157 |
| **Modest** | 192 | 172 | 162 | 158 |
| **Loose** | 203 | 180 | 168 | 163 |
| **Loose** | **Strict** | 201 | 181 | 170 | 166 |
| **Realistic** | 208 | 185 | 173 | 168 |
| **Modest** | 213 | 188 | 175 | 169 |
| **Loose** | 224 | 195 | 180 | 173 |

Abbreviations: SBP, systolic blood pressure; IRCVD, incidence rate of cardiovascular disease.

**Table S12. Simulation-oriented switching SBP level in over 80 year-old male and 70 to 79 year-old female subjects in the log-normal distribution of SBP under the quadratic relationship between SBP and IRCVD**

| **Lifestyle modifications**  **supported by health nurses** | | **Ideal** | **Optimistic** | **Realistic** | **Pessimistic** |
| --- | --- | --- | --- | --- | --- |
| **Antihypertensive medications** | |  |  |  |  |
| **Consultation rate** | **SBP lowering effect** |  |  |  |  |
| **Strict** | **Strict** | 158 | 146 | 140 | 137 |
| **Realistic** | 168 | 153 | 147 | 144 |
| **Modest** | 171 | 155 | 148 | 145 |
| **Loose** | 185 | 165 | 157 | 154 |
| **Realistic** | **Strict** | 169 | 155 | 148 | 145 |
| **Realistic** | 177 | 161 | 153 | 149 |
| **Modest** | 181 | 163 | 154 | 150 |
| **Loose** | 192 | 171 | 161 | 157 |
| **Modest** | **Strict** | 181 | 165 | 158 | 155 |
| **Realistic** | 188 | 170 | 161 | 157 |
| **Modest** | 192 | 172 | 162 | 158 |
| **Loose** | 203 | 180 | 168 | 163 |
| **Loose** | **Strict** | 201 | 181 | 170 | 166 |
| **Realistic** | 209 | 185 | 173 | 168 |
| **Modest** | 213 | 188 | 175 | 169 |
| **Loose** | 224 | 195 | 180 | 173 |

Abbreviations: SBP, systolic blood pressure; IRCVD, incidence rate of cardiovascular disease.

**Table S13. Simulation-oriented Switching SBP level in over 80 year-old female subjects in the log-normal distribution of SBP under the quadratic relationship between SBP and IRCVD**

| **Lifestyle modifications**  **supported by health nurses** | | **Ideal** | **Optimistic** | **Realistic** | **Pessimistic** |
| --- | --- | --- | --- | --- | --- |
| **Antihypertensive medications** | |  |  |  |  |
| **Consultation rate** | **SBP lowering effect** |  |  |  |  |
| **Strict** | **Strict** | 158 | 146 | 140 | 137 |
| **Realistic** | 168 | 153 | 147 | 144 |
| **Modest** | 171 | 155 | 148 | 145 |
| **Loose** | 185 | 165 | 157 | 154 |
| **Realistic** | **Strict** | 169 | 155 | 148 | 145 |
| **Realistic** | 177 | 161 | 153 | 149 |
| **Modest** | 181 | 163 | 154 | 150 |
| **Loose** | 192 | 171 | 161 | 157 |
| **Modest** | **Strict** | 181 | 165 | 158 | 155 |
| **Realistic** | 188 | 170 | 161 | 157 |
| **Modest** | 192 | 172 | 162 | 158 |
| **Loose** | 203 | 180 | 168 | 163 |
| **Loose** | **Strict** | 201 | 181 | 170 | 166 |
| **Realistic** | 209 | 185 | 173 | 168 |
| **Modest** | 213 | 188 | 175 | 169 |
| **Loose** | 224 | 195 | 180 | 173 |

Abbreviations: SBP, systolic blood pressure; IRCVD, incidence rate of cardiovascular disease.
